# Supplementary material
Source: ML conference proceedings conference paper supplement (https://openaccess.thecvf.com/content/CVPR2023/html/Fang_Efficient_Robust_Principal_CVPR_2023_paper.html)
Supplement: Supplementary file 1 [file Fang_Efficient_Robust_Principal_CVPR_2023_supplemental.pdf]

# Supplementary Material for “Efficient Robust Principal Component Analysis via Block Krylov Iteration and CUR Decomposition”

Shun Fang<sup>1,2</sup> Zhengqin Xu<sup>3</sup> Shiqian Wu<sup>1,2,4\*</sup> Shoulie Xie<sup>5</sup>

<sup>1</sup>School of Information Science and Engineering, Wuhan University of Science and Technology, China

<sup>2</sup>Institute of Robotics and Intelligent Systems, Wuhan University of Science and Technology, China

<sup>3</sup>MoE Key Lab of Artificial Intelligence, AI Institute, Shanghai Jiao Tong University, China

<sup>4</sup>Hubei Province Key Laboratory of Intelligent Information Processing and Real-Time Industrial Systems

<sup>5</sup>Signal Processing, RF & Optical Dept. Institute for Infocomm Research A\*STAR, Singapore

fangshun97@wust.edu.cn, fate311@sjtu.edu.cn, shiqian.wu@wust.edu.cn, slxie@i2r.a-star.edu.sg

In this supplementary material, we present more experimental results which are not included in the main paper due to page limitation.

In this section, we conduct more experiments on the following five videos: *Candela\_m1.10*, *HallAndMonitor*, *HighwayI*, *HumanBody2*, and *IBMtest2* from Scene Background Initialization (SBI) dataset<sup>1</sup>. The performance measurements are: AGE, pEP, pCEP, PSNR, MS-SSIM, CQM, and TIME.

## 1. Candela\_m1.10

The size of each frame of *Candela\_m1.10* is  $352 \times 288$ . The foreground “man” keeps a long seated state in the video, which leads a ghost in the background in Fig. 1. PETRELS obtains best performance and IRCUR is fastest in Table 1. The proposed eRPCA obtains the similar results. In Fig. 1, eRPCA of each frame is more stable than PETRELS.

## 2. HallAndMonitor

The size of each frame of *HallAndMonitor* is  $352 \times 240$ . Similarly, the man in white maintains the same position in the background, which leads a ghost. In Table 2, eRPCA obtains the best objective evaluation results. For visual results, eRPCA only has a ghost in the background, but other methods include more foreground information in the background shown in Fig. 2.

## 3. HighwayI

The size of each frame of *HighwayI* is  $320 \times 240$ . This scene is easy to separate because the foreground “cars”

move fast. In Fig. 3, the visual results are similar. In Table 3, the objective evaluations of eRPCA are better than others apart from AGE.

## 4. HumanBody2

The size of each frame of *HumanBody2* is  $320 \times 240$ . Each frame is well separated by different methods in Fig. 4. In addition, the flashing light effect can be displayed in the foreground for eRPCA. In Table 4, eRPCA obtains better results.

## 5. IBMtest2

The size of each frame of *IBMtest2* is  $320 \times 240$ . The scene is simple and most algorithms perform well in Fig. 5. PETRELS is sensitive to excessive reflections and much noise. It can be seen from 5 that the proposed eRPCA outperforms other methods except for pCEPS.

## 6. Videos

In this supplementary material, we also present videos to verify the efficiency and effectiveness of the proposed method.

\*Shiqian Wu is corresponding author.

<sup>1</sup><https://sbmi2015.na.icar.cnr.it/SBIdataset.html>

Table 1. Performance of one frame from Candela\_m1.10 dataset among different algorithms

|          | AGE           | pEPs%         | pCEPs%        | MSSSIM        | PSNR           | QOM            | TIME(s)        |
|----------|---------------|---------------|---------------|---------------|----------------|----------------|----------------|
| ARE-RPCA | 4.8392        | 3.6725        | 2.2925        | 0.9358        | 27.0294        | 26.2677        | 9.9506         |
| IRCUR    | 4.5591        | 3.705         | 2.1997        | 0.9312        | 26.5602        | 25.8461        | <b>0.01288</b> |
| PETRELS  | <b>4.4883</b> | <b>3.4515</b> | <b>1.9679</b> | <b>0.9435</b> | <b>28.2685</b> | <b>27.5266</b> | 0.665746       |
| ADW-RPCA | 4.5088        | 3.7149        | 2.2372        | 0.9337        | 26.923         | 26.2355        | 3.758677       |
| eRPCA    | 4.6558        | 3.5669        | 2.1001        | 0.9383        | 27.0326        | 26.2908        | 0.05646        |

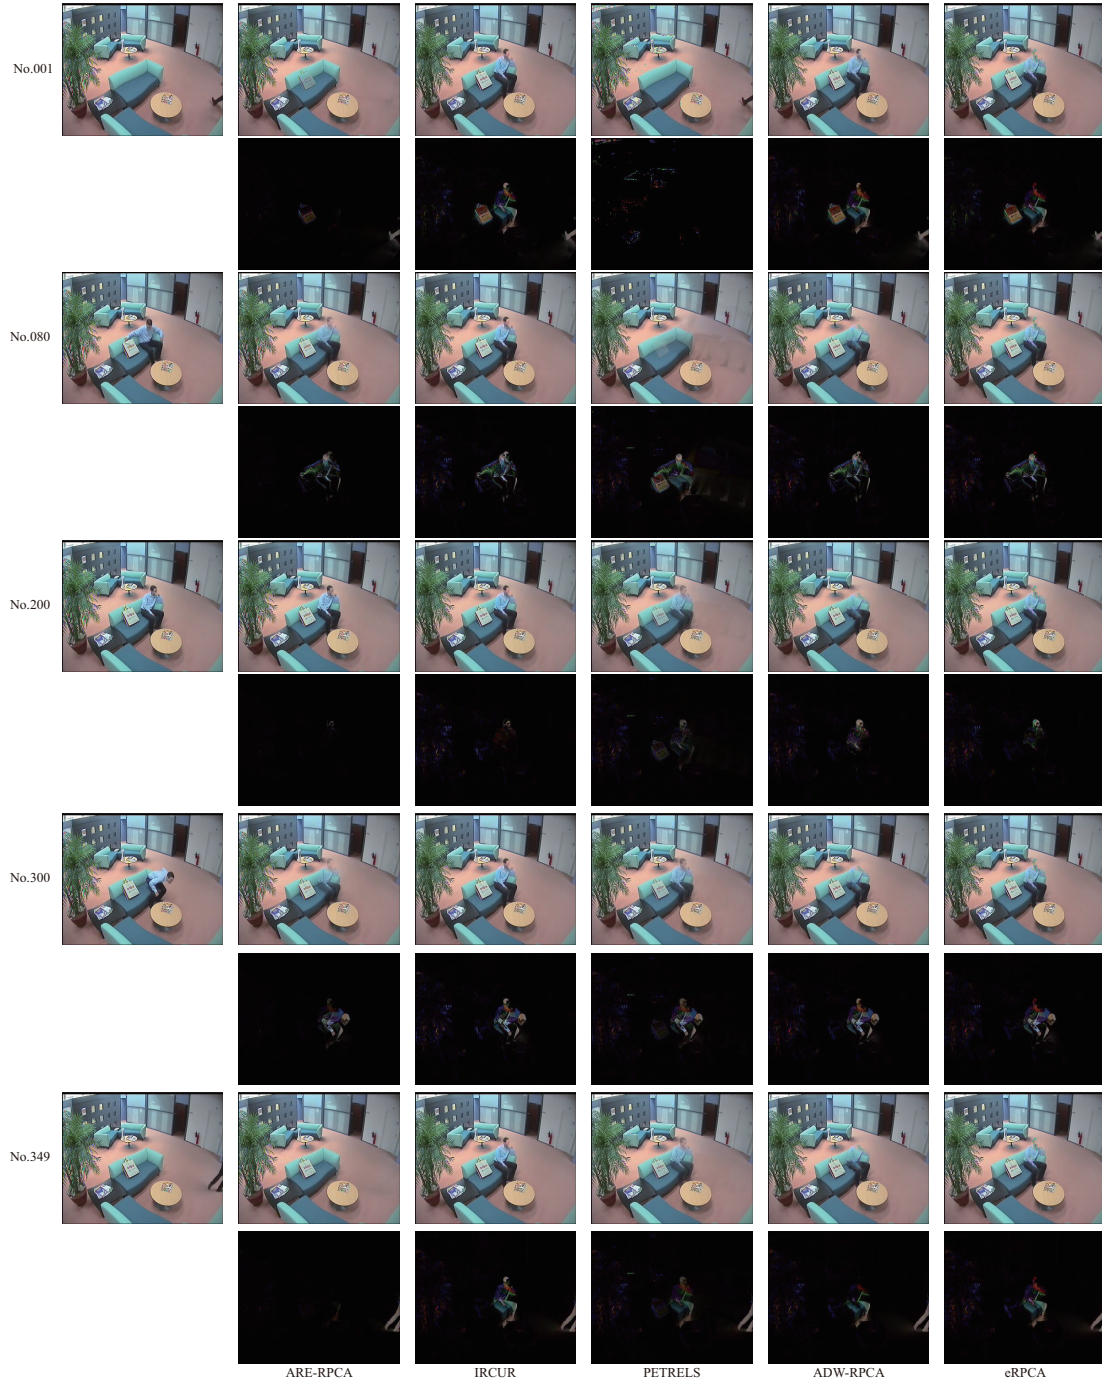

Figure 1. The comparison of visual results on Candela\_m1.10 among different algorithms.

Table 2. Performance of one frame from HallAndMonitor dataset among different algorithms

|          | AGE           | pEPs%         | pCEPS%        | MSSSIM        | PSNR           | CQM            | TIME(s)        |
|----------|---------------|---------------|---------------|---------------|----------------|----------------|----------------|
| ARE-RPCA | 3.922         | 2.4633        | 1.2464        | 0.953         | 29.7385        | 29.6704        | 7.99907        |
| IRCUR    | 3.38          | 1.4228        | 0.651         | 0.9564        | 29.2765        | 29.0621        | <b>0.01268</b> |
| PETRELS  | 12.2361       | 9.6165        | 4.014         | 0.8606        | 17.7815        | 17.351         | 0.94426        |
| ADW-RPCA | 3.3671        | 1.2559        | 0.5919        | 0.958         | 29.4232        | 29.3636        | 3.229358       |
| eRPCA    | <b>3.1321</b> | <b>1.0535</b> | <b>0.4273</b> | <b>0.9747</b> | <b>31.6776</b> | <b>30.9741</b> | 0.051737       |

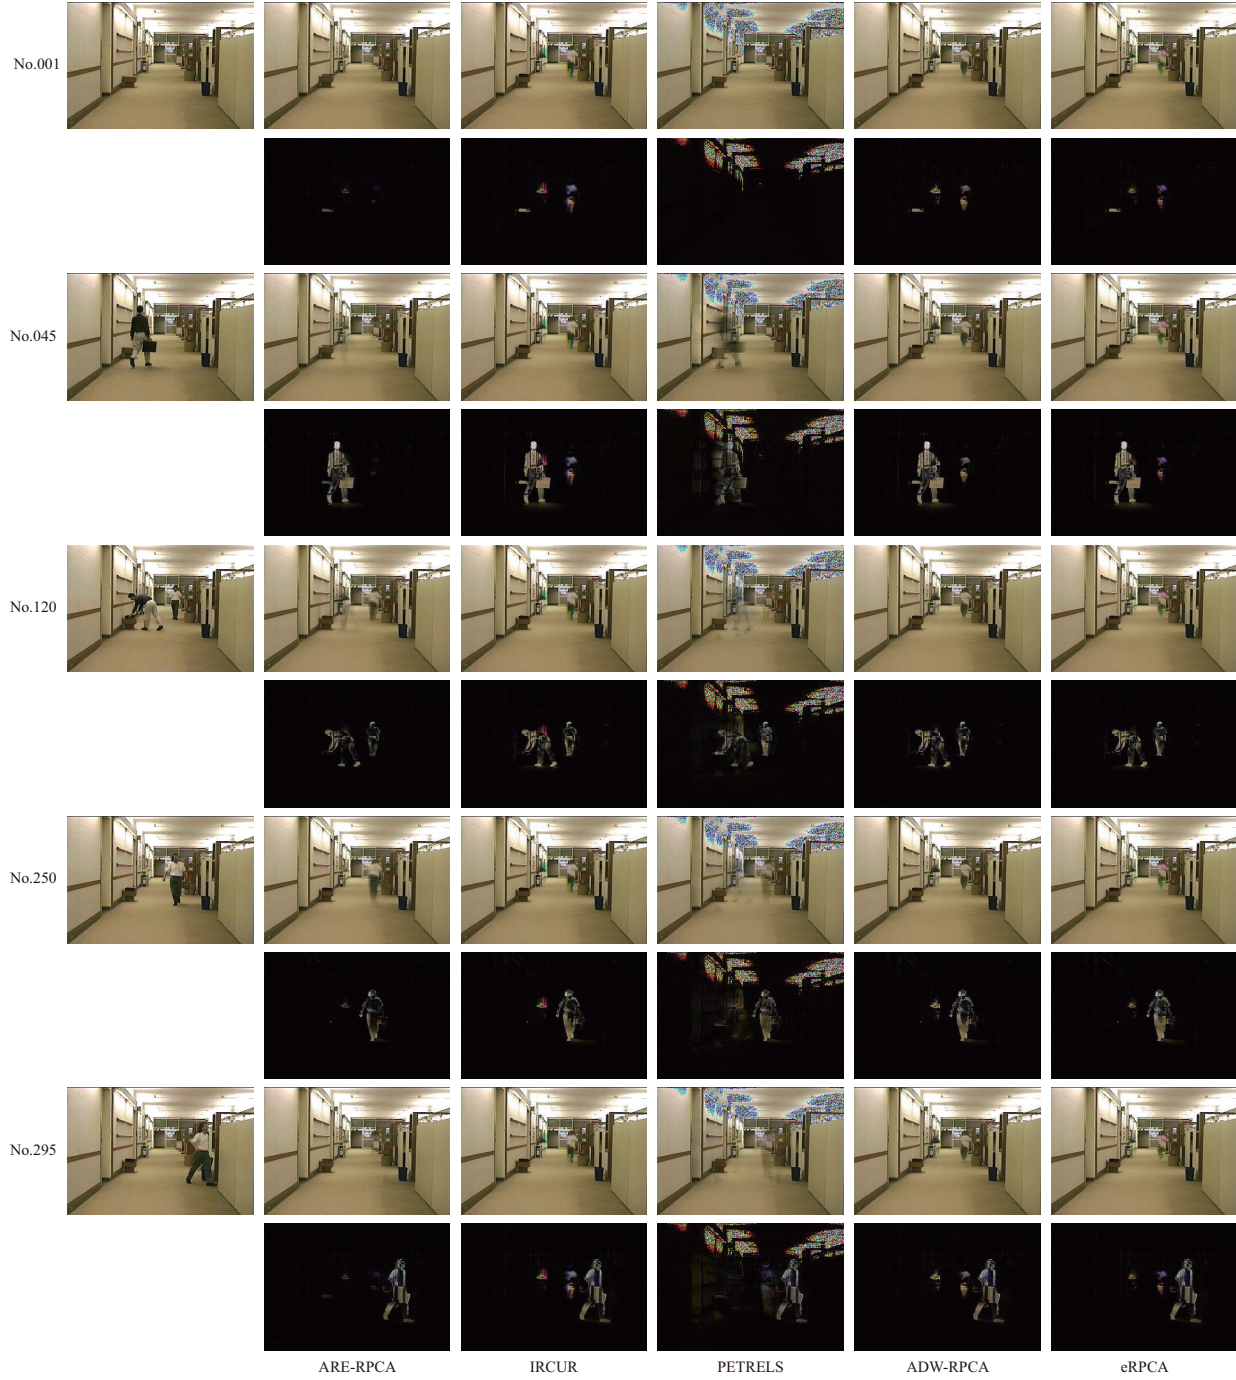

Figure 2. The comparison of visual results on HallAndMonitor among different algorithms.

Table 3. Performance of one frame from HighwayI dataset among different algorithms

|          | AGE           | pEPs%         | pCEPs%        | MSSSIM        | PSNR           | QOM            | TIME(s)        |
|----------|---------------|---------------|---------------|---------------|----------------|----------------|----------------|
| ARE-RPCA | 2.387         | 0.151         | 0.013         | 0.9817        | 37.0762        | 36.7377        | 5.267023       |
| IRCUR    | <b>1.5779</b> | 0.1901        | 0.0247        | 0.9899        | 39.436         | 38.9574        | <b>0.00845</b> |
| PETRELS  | 4.3669        | 0.2917        | 0.0482        | 0.9622        | 33.6238        | 32.6101        | 0.506284       |
| ADW-RPCA | 1.8532        | 0.168         | 0.0182        | 0.9899        | 38.9903        | 38.711         | 1.589877       |
| eRPCA    | 1.5939        | <b>0.1458</b> | <b>0.0117</b> | <b>0.9901</b> | <b>39.6658</b> | <b>39.1678</b> | 0.033886       |

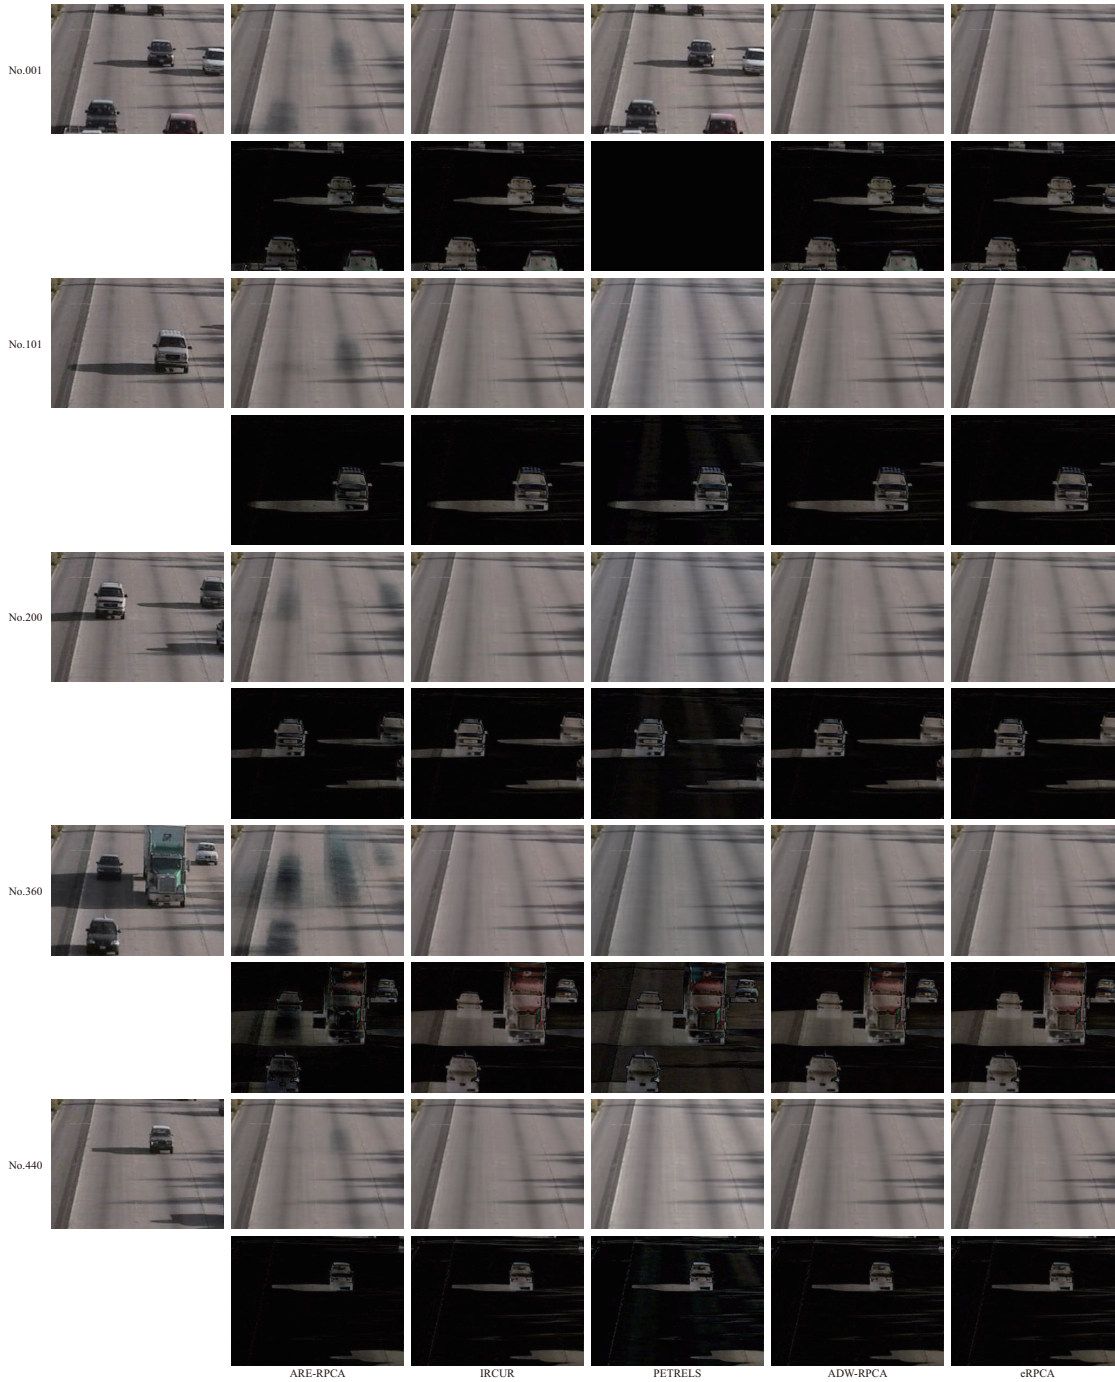

Figure 3. The comparison of visual results on HighwayI among different algorithms.

Table 4. Performance of one frame from HumanBody2 dataset among different algorithms

|          | AGE           | pEPs%         | pCEPs%        | MSSSIM        | PSNR           | CQM            | TIME(s)        |
|----------|---------------|---------------|---------------|---------------|----------------|----------------|----------------|
| ARE-RPCA | 8.6089        | 10.8971       | 7.0417        | 0.9335        | 22.8818        | 22.3712        | 9.725046       |
| IRCUR    | 3.1827        | 0.6875        | 0.0378        | 0.9947        | 33.8956        | 32.8492        | <b>0.00469</b> |
| PETRELS  | 14.467        | 15.776        | 9.9284        | 0.8428        | 17.8471        | 17.2904        | 0.448968       |
| ADW-RPCA | 3.1547        | 0.6016        | 0.0599        | 0.9943        | 33.7795        | 32.5693        | 2.769496       |
| eRPCA    | <b>3.1225</b> | <b>0.5352</b> | <b>0.0169</b> | <b>0.9954</b> | <b>34.3688</b> | <b>33.0228</b> | 0.020845       |

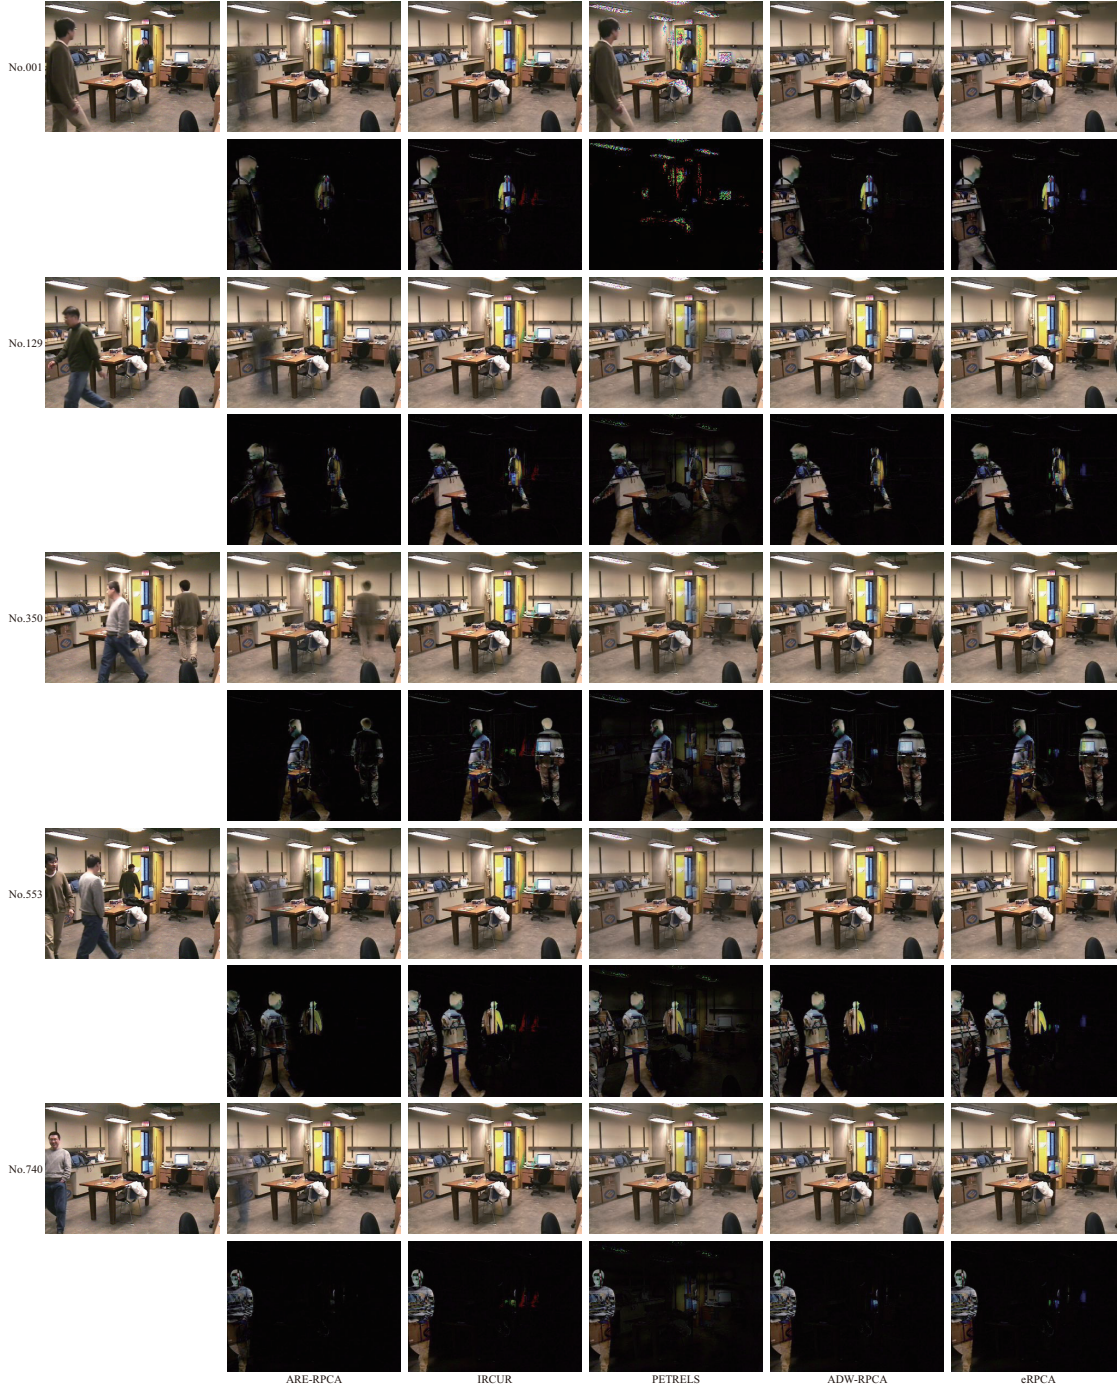

Figure 4. The comparison of visual results on HumanBody2 among different algorithms.

Table 5. Performance of one frame from IBMtest2 dataset among different algorithms

|          | AGE           | pEPs%         | pCEPS%   | MSSSIM        | PSNR           | CQM            | TIME(s)        |
|----------|---------------|---------------|----------|---------------|----------------|----------------|----------------|
| ARE-RPCA | 3.0977        | <b>0.1016</b> | <b>0</b> | 0.9932        | 35.3008        | 34.1           | 3.784217       |
| IRCUR    | 2.8578        | 0.1250        | <b>0</b> | 0.9940        | 36.1595        | 34.9419        | <b>0.03032</b> |
| PETRELS  | 9.3906        | 6.7891        | 1.5586   | 0.8637        | 19.7138        | 19.0021        | 0.44805        |
| ADW-RPCA | 3.089         | 0.1432        | <b>0</b> | 0.9936        | 35.5056        | 34.2255        | 3.137686       |
| eRPCA    | <b>2.7805</b> | <b>0.1016</b> | <b>0</b> | <b>0.9943</b> | <b>36.3659</b> | <b>35.1562</b> | 0.10676        |

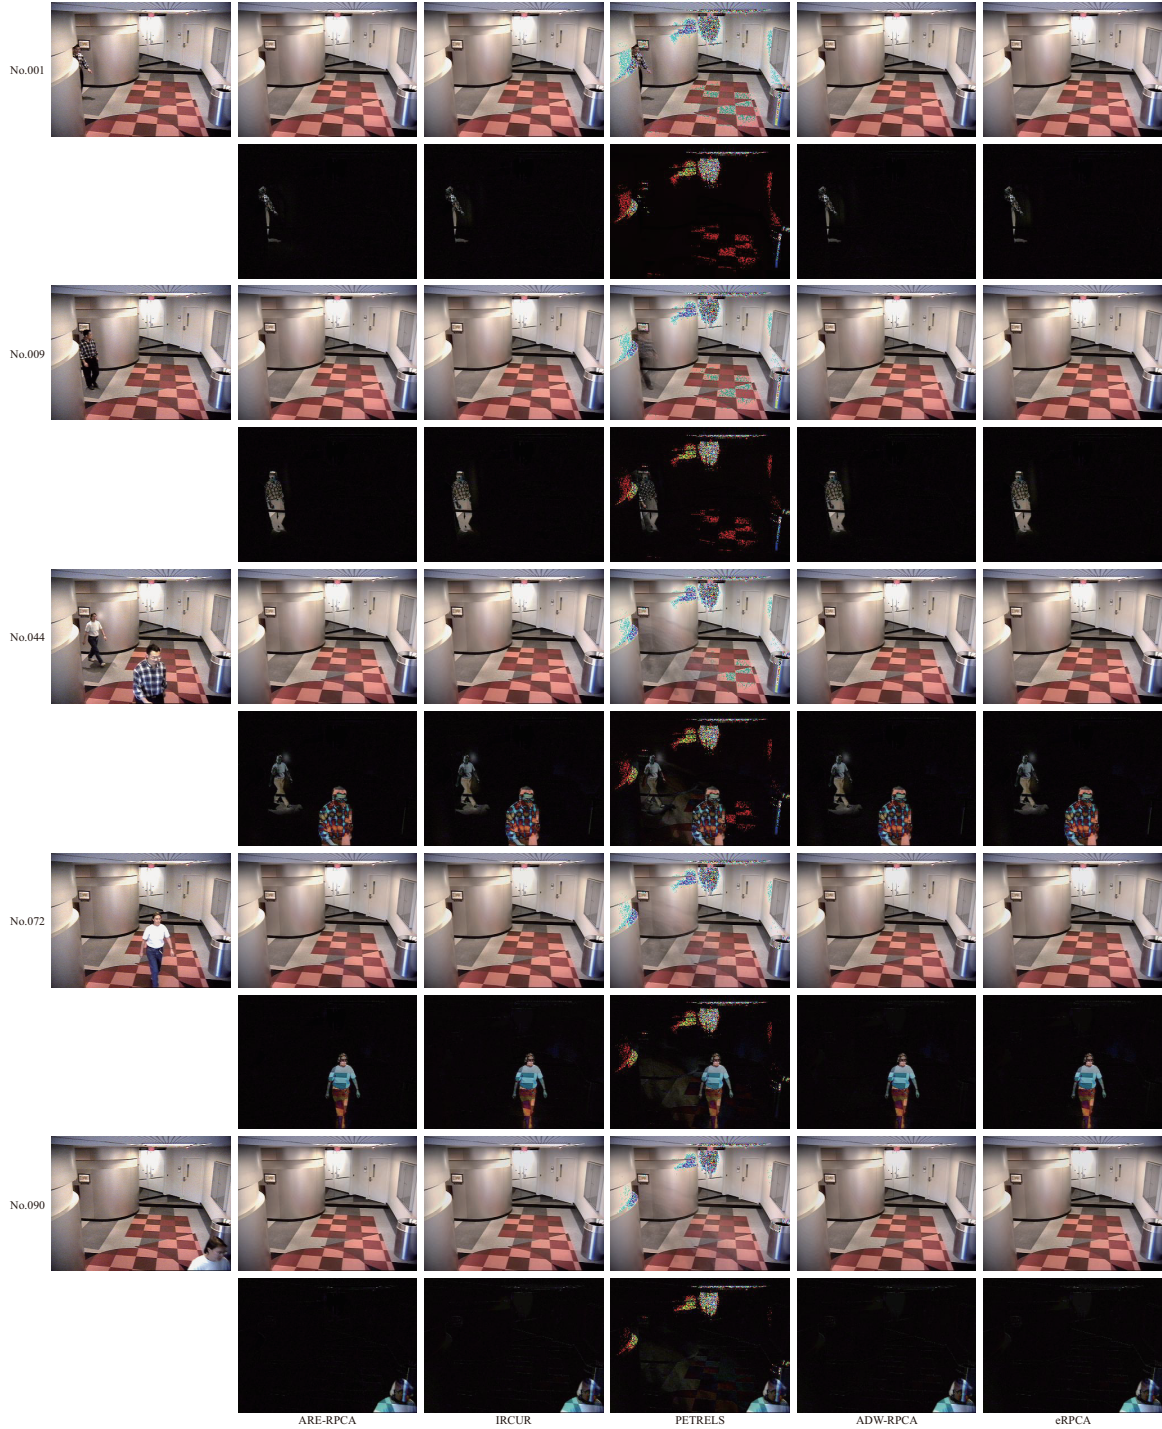

Figure 5. The comparison of visual results on IBMtest2 among different algorithms.
